# Supplementary material for: Stereoselective synthesis of sulfur-containing β-enaminonitrile derivatives through electrochemical Csp3–H bond oxidative functionalization of acetonitrile
Source: PubMed Central journal article supplement (PMC6381189; doi:10.1038/s41467-019-08762-5), 2019-02-19
Supplement: 41467_2019_8762_MOESM3_ESM.pdf [file 41467_2019_8762_MOESM3_ESM.pdf]

### **Description of Additional Supplementary Files**

**File Name:** Supplementary Dataset 1

**Description:** Cartesian coordinates for all optimized structures
